# Supplementary material
Source: Elsevier journal article supplement (https://www.sciencedirect.com/science/article/pii/S1579212919300138)
Supplement: mmc1 [file S1579212919300138:mmc1.docx]

**Apéndice A**

| **Escala de Autoeficacia para el Manejo del Asma*** |
| --- |
| 1. Imagínate que tienes dificultad para respirar u opresión en el pecho: ¿cómo de seguro/a te sientes de poder saber si debes tomar o no las medicinas? 2. Imagínate que tienes opresión en el pecho: ¿cómo de seguro/a te sientes de poder saber si ese ataque puede empeorar o no? 3. ¿Crees poder explicar en qué situaciones te puede dar una crisis de asma? 4. ¿Cómo de seguro/a te sientes de poder decirle a tu profesor/a de educación física que debes relajarte cuando tienes dificultad para respirar? 5. Imagínate que tienes una crisis: ¿cómo de seguro/a te sientes de poder decidir cuántas aplicaciones debes darte con el inhalador? 6. Imagínate que tienes dificultad para respirar: ¿cómo de seguro/a te sientes de poder pedir ayuda? 7. ¿Cómo de seguro/a te sientes de poder controlar tu asma? 8. ¿Cómo de seguro/a te sientes de poder explicarle al doctor cómo te sientes? 9. ¿Cómo de seguro/a te sientes de poder hacerle preguntas al médico en relación a tu asma? 10. Imagínate que tienes dificultad para respirar y una fuerte tos: ¿Cómo de seguro/a te sientes de poder decidir qué medicina debes tomar? 11. Imagínate que te sientes enfermo/a: ¿cómo de seguro/a te sientes de poder pedir ayuda? 12. Imagínate que el médico te receta unos medicamentos distintos a los que tú siempre tomas: ¿cómo de seguro/a te sientes de poder preguntarle a él/ella por qué te cambió los medicamentos? 13. ¿Cómo de seguro/a te sientes de poder discutir con el médico los problemas que pueden presentarse a causa de tu asma? 14. En caso de ser necesario: ¿cómo de seguro/a te sientes de poder decidir cuántas aplicaciones debes darte con el inhalador? 15. ¿Cómo de seguro/a te sientes de poder resolver los problemas que pueden presentarse a causa de tu asma? 16. ¿Cómo de seguro/a te sientes de poder alejarte de las cosas o sitios que puedan provocarte una crisis de asma, por ejemplo, humo de un cigarrillo, una habitación húmeda? 17. ¿Cómo de seguro/a te sientes de poder decidir qué medicamentos debes tomar diariamente? 18. ¿Cómo de seguro/a te sientes de poder decidir qué deportes puedes practicar? 19. ¿Cómo de seguro/a te sientes de poder pedir ayuda a tus padres o amigos cuando los necesites? 20. ¿Cómo de seguro estás de poder decidir si te quedas a dormir en algún lugar (con amigos, con otros familiares, etc.)? |
| Opciones de respuesta:  0=Totalmente inseguro/a.  1=Un poco seguro/a.  2=Seguro/a.  3=Muy seguro/a. |
| ***** Validación al español del *Asthma Self-efficacy Scale*(19). Fuente: Fortoul, B. Autoeficacia percibida en habilidades de automanejo para el control del asma infantil [Tesis inédita]. Sartenejas, Caracas: Universidad Simón Bolívar; 1996. |

**Apéndice B**

| **Paediatric Asthma Quality of Life Questionnaire (PAQLQ)**(20-22) |
| --- |
| ¿Cuánto te ha molestado el asma al hacer las siguientes actividades durante los últimos 7 días?   1. _______________________ (Lista estandarizada de actividades). 2. _______________________ (Lista estandarizada de actividades). 3. _______________________ (Lista estandarizada de actividades). 4. ¿Cuánto te ha molestado durante los últimos 7 días la tos?   En general, ¿con qué frecuencia durante los últimos 7 días te has sentido…   1. …desilusionado o triste por no haber podido hacer lo que querías debido al asma? 2. …cansado debido al asma? 3. …preocupado o inquieto debido al asma? 4. ¿Cuánto te ha molestado durante los últimos 7 días los ataques de asma? 5. En general, ¿con qué frecuencia durante los últimos 7 días te has sentido enfadado debido al asma? 6. ¿Cuánto te ha molestado durante los últimos 7 días los pitos o silbidos en el pecho? 7. En general, ¿con qué frecuencia durante los últimos 7 días te has sentido irritable o del mal humor debido al asma? 8. ¿Cuánto te ha molestado durante los últimos 7 días la dificultad para respirar o la opresión en el pecho? 9. En general, ¿con qué frecuencia durante los últimos 7 días te has sentido diferente o te han dejado de lado debido al asma? 10. ¿Cuánto te ha molestado durante los últimos 7 días la falta de aire?   En general, ¿con qué frecuencia durante los últimos 7 días…   1. …te has sentido desilusionado o triste porque no podías seguir el ritmo de los demás? 2. …te has despertado por la noche debido al asma? 3. …te has sentido te has sentido nervioso o molesto debido al asma? 4. …has notado que te quedabas sin aire? 5. …has notado que no podías seguir el ritmo de los demás debido al asma? 6. …dormiste mal por la noche debido al asma? 7. …te has sentido has tenido miedo durante un ataque de asma? 8. Piensa en todas las actividades o cosas que hiciste durante los últimos 7 días... ¿Cuánto te molestó el asma mientras las hacías? 9. En general, ¿con qué frecuencia durante los últimos 7 días te ha costado respirar hondo? |
| Lista estandarizada de actividades: 1.Reír; 2.Correr; 3.Subir una cuesta; 4.Subir escaleras; 5.Caminar; 6.Estar en un sitio cerrado; 7.Jugar en el recreo; 8.Jugar con los amigos; 9.Salir con los amigos; 10.Jugar con animales domésticos; 11.Bailar; 12.Dormir; 13.Levantarse por la mañana; 14.Hacer trabajos domésticos; 15.Hablar; 16.Cantar; 17.Gritar; 18.Hacer manualidades o hobbies; 19.Estudiar; 20.Fútbol; 21.Montar en bicicleta; 22.Baloncesto; 23.Natación; 24.Judo, Karate, Tae-kwondo; 25.Tenis; 26.Frontón; 27.Atletismo; 28.Ir en monopatín; 29.Ir de excursión; 30.Rugby; 31.Voleibol; 32.Patinar; 33.Gimnasia; 34.Esquiar; 35.Hochey; 36.Escalar; 37.Saltar a la comba. |
| Opciones de respuesta:  Ítems 1-4, 8, 10, 12, 14, 22: 1=Muchísimo; 2=Mucho; 3=Bastante; 4=Algo; 5=Un poco; 6=Muy poco; 7=Nada.  Ítems 5-7, 9, 11, 13, 15-21, 23: 1=Siempre; 2=Casi siempre; 3=Muchas veces; 4=Bastantes veces; 5=Algunas veces; 6=Casi nunca; 7=Nunca. |

**Apéndice C**

| **Paediatric Asthma Caregiver’s Quality of Life Questionnaire (PACQLQ)**(23) |
| --- |
| Durante los 7 últimos días, ¿con qué frecuencia…   1. …se ha sentido impotente o asustado/a cuando el niño o la niña tenía tos, pitos o silbidos en el pecho o falta de aire? 2. …su familia ha tenido que cambiar los planes a causa del asma del niño o de la niña? 3. …se ha sentido usted frustrado/a o impaciente porque el niño o la niña estaba irritable por culpa del asma? 4. …ha interferido el asma del niño o de la niña en su trabajo o en las tareas domésticas? 5. …se ha sentido usted angustiado/a por la tos, pitos o silbidos en el pecho o la falta de aire del niño o de la niña? 6. …ha pasado noches sin dormir por culpa del asma del niño o de la niña? 7. …se ha sentido molesto/a porque el asma del niño o de la niña interfería en la relación familiar? 8. …se ha despertado por la noche por culpa del asma del niño o de la niña? 9. …se ha sentido triste porque el niño la niña tiene asma?   Durante los últimos 7 días, ¿hasta qué punto ha estado usted preocupado/a…   1. …por cómo realiza el niño o la niña sus actividades diarias normales? 2. …por la medicación para el asma del niño o de la niña y sus efectos secundarios? 3. …por ser sobreprotector/a con el niño o la niña? 4. …por si el niño o la niña sería capaz de llevar una vida normal? |
| Opciones de respuesta:  Ítems 1-9: 1=Siempre; 2=Casi siempre; 3=Muchas veces; 4=Bastantes veces; 5=Algunas veces; 6=Casi nunca; 7=Nunca.  Ítems 10-13: 1=Extremadamente preocupado/a; 2=Muy preocupado/a; 3=Bastante preocupado/a; 4=Algo preocupado/a; 5=Un poco preocupado/a; 6=Muy poco preocupado/a; 7=Nada preocupado/a. |
